# Supplementary material
Source: publisher figshare collection journal article supplement (https://frontiersin.figshare.com/ndownloader/files/16725374)
Supplement: Supplementary file [file 16725374]

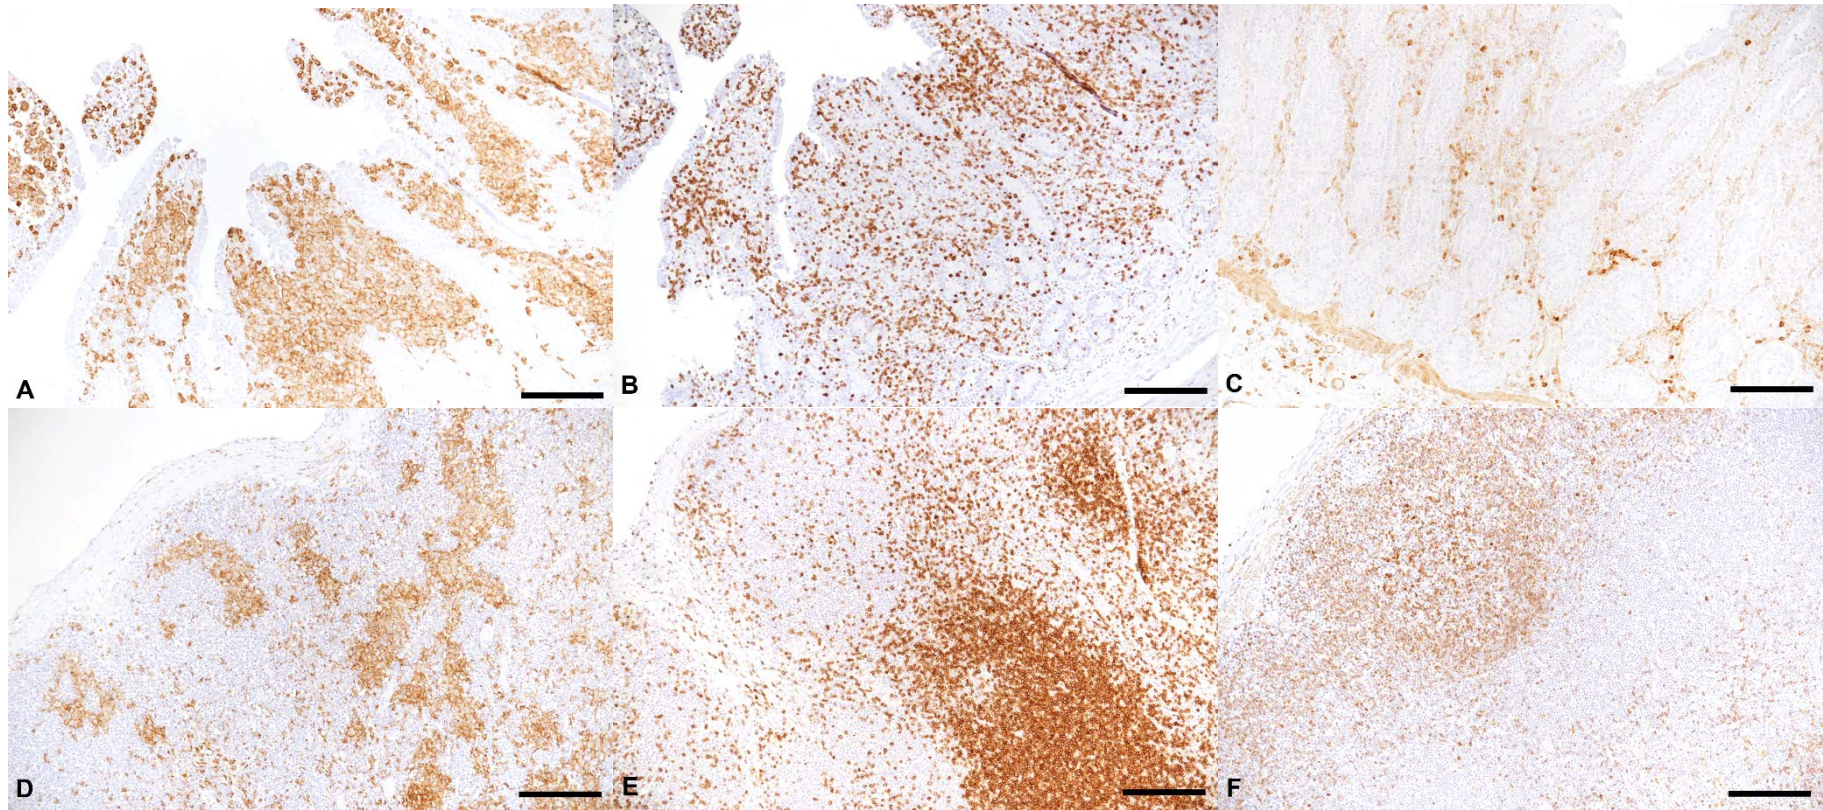

### Supplementary Figure S1

Immunohistological detection of macrophages, T and B lymphocytes small intestine and mesenteric lymph node of goats with paratuberculosis (“goat 1”). **(A)** Infiltration of the villous lamina propria with macrophages, Iba1 IHC, bar = 100 μm. **(B)** Diffuse infiltration of the lamina propria with T lymphocytes, CD3 IHC, bar = 100 μm. **(C)** Small number of B lymphocytes in basal areas of lamina propria, CD79a IHC, bar = 100 μm. **(D)** Nodular perifollicular infiltration of epithelioid macrophages in the lymph node, Iba1 IHC, bar = 100 μm. **(E)** Paracortical hyperplasia of T lymphocytes in the mesenteric lymph node, CD3 IHC, bar = 100 μm. **(F)** Follicular hyperplasia of B lymphocytes in the mesenteric lymph node, CD79a IHC, bar = 100 μm. IHC = immunohistochemistry.
